# Supplementary material for: Distorted Pacific–North American teleconnection at the Last Glacial Maximum
Source: Copernicus journal article supplement (doi:10.5194/cp-16-199-2020), 2020-01-23
Supplement: Supplementary file 1 [file cp-16-199-2020-supplement.pdf]

Supplement of Clim. Past, 16, 199–209, 2020  
<https://doi.org/10.5194/cp-16-199-2020-supplement>  
© Author(s) 2020. This work is distributed under  
the Creative Commons Attribution 4.0 License.

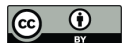

*Supplement of*

## **Distorted Pacific–North American teleconnection at the Last Glacial Maximum**

**Yongyun Hu et al.**

*Correspondence to:* Yongyun Hu (yyhu@pku.edu.cn)

The copyright of individual parts of the supplement might differ from the CC BY 4.0 License.

## Supplementary materials

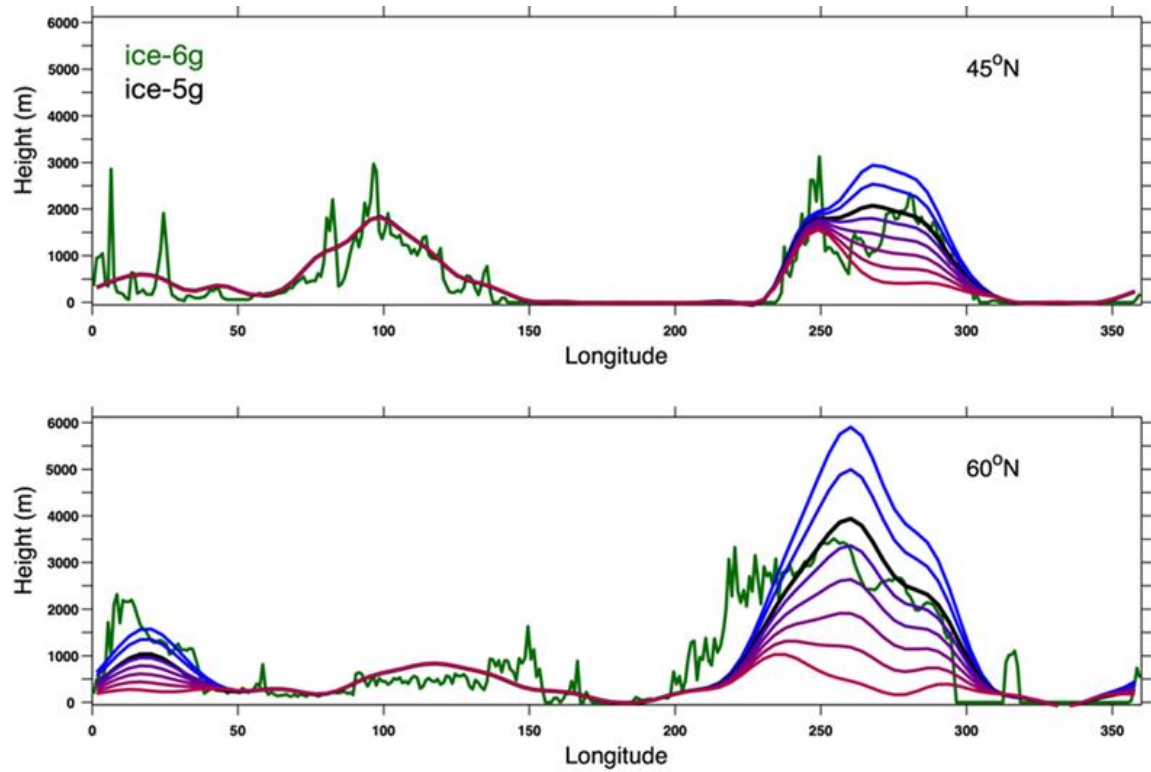

**Figure S1.** Vertical cross-sections of the Northern-Hemisphere ice sheet thicknesses for ICE-5G and ICE-6G at 45 °N and 60 °N. Different ice sheet thicknesses (from 20% to 150%) in our sensitivity experiments for ICE-5G are plotted here.

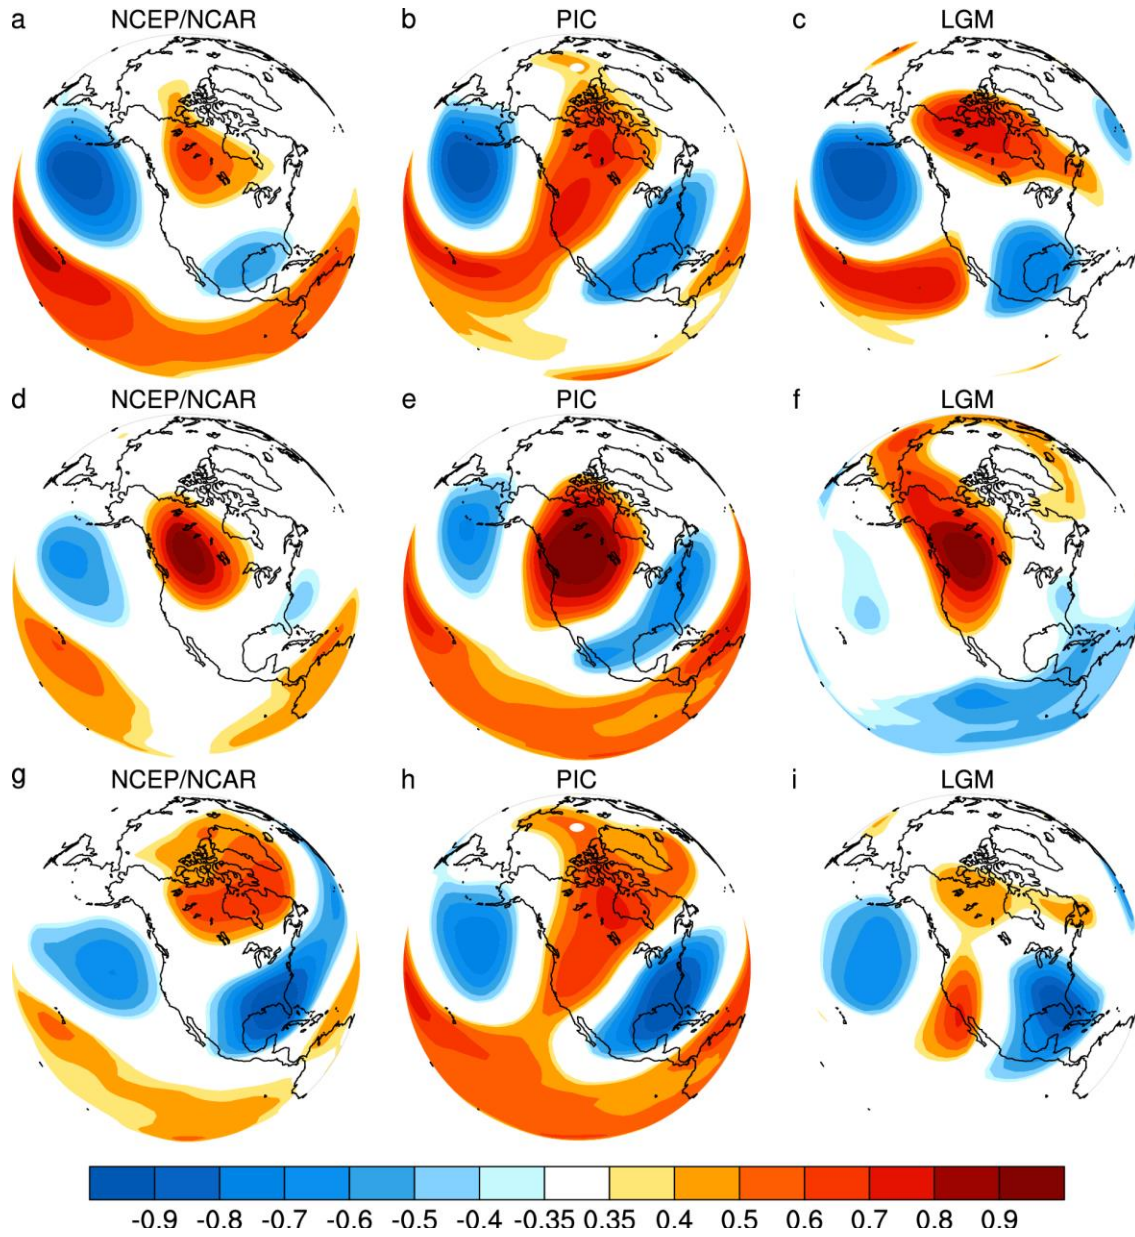

**Figure S2.** One-point correlation maps of 500 hPa geopotential heights in DJF for different base points in NCEP/NCAR reanalysis and PMIP2 CCSM3 simulations. Left panels: NCEP/NCAR, middle panels: PIC, and right panels: LGM. From top to bottom, the base point is at: North Pacific (45 °N and 165 °W), Alberta of Canada (55 °N and 115 °W), and Gulf Mexico (30 °N and 85 °W), respectively. The correlation coefficient of 0.35 corresponds to the 95% confidence level for 30-year correlations. For the all three base points, the correlation coefficients near Hawaii are set to positive.

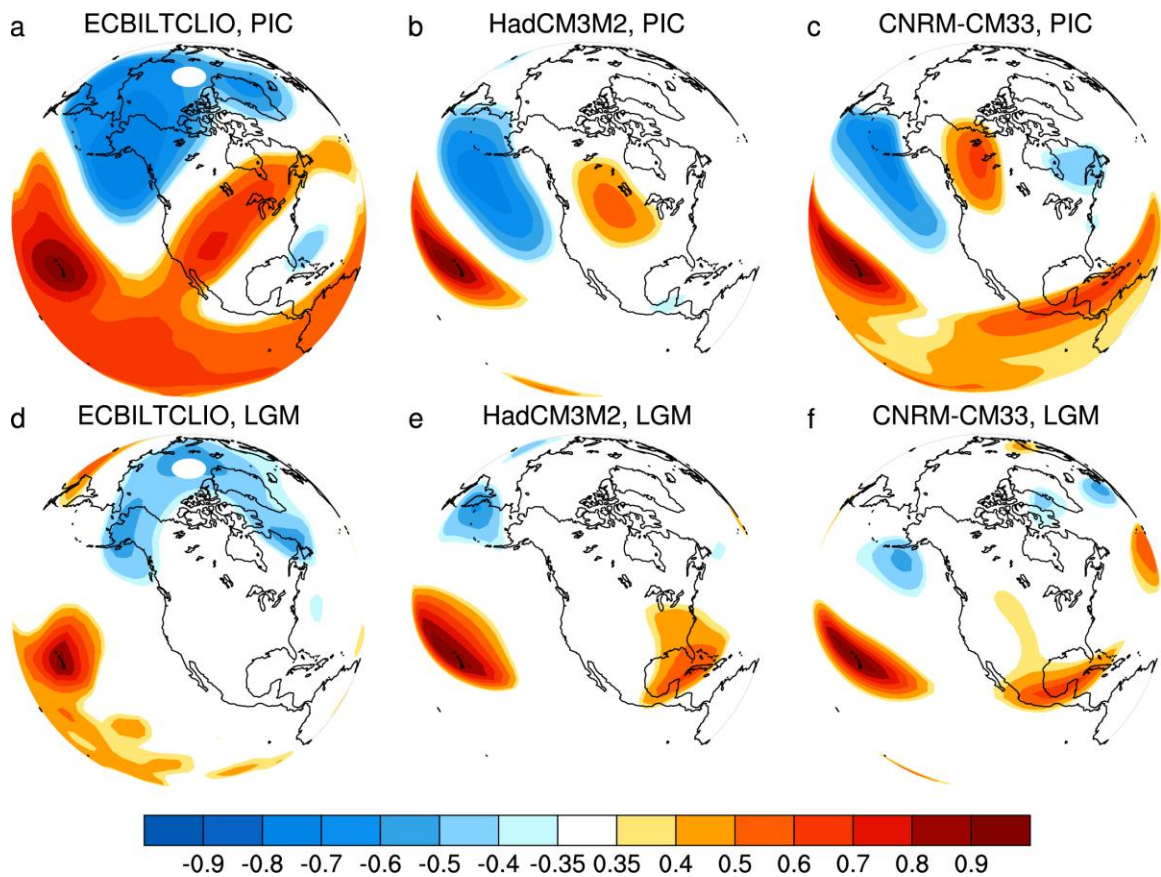

**Figure S3.** One-point correlation maps of 500 hPa geopotential heights in DJF in three other PMIP2 models. Upper panels: PIC simulations, and lower panels: LGM simulations. The base point is near Hawaii. The correlation coefficient of 0.35 corresponds to the 95% confidence level for 30-year correlations.

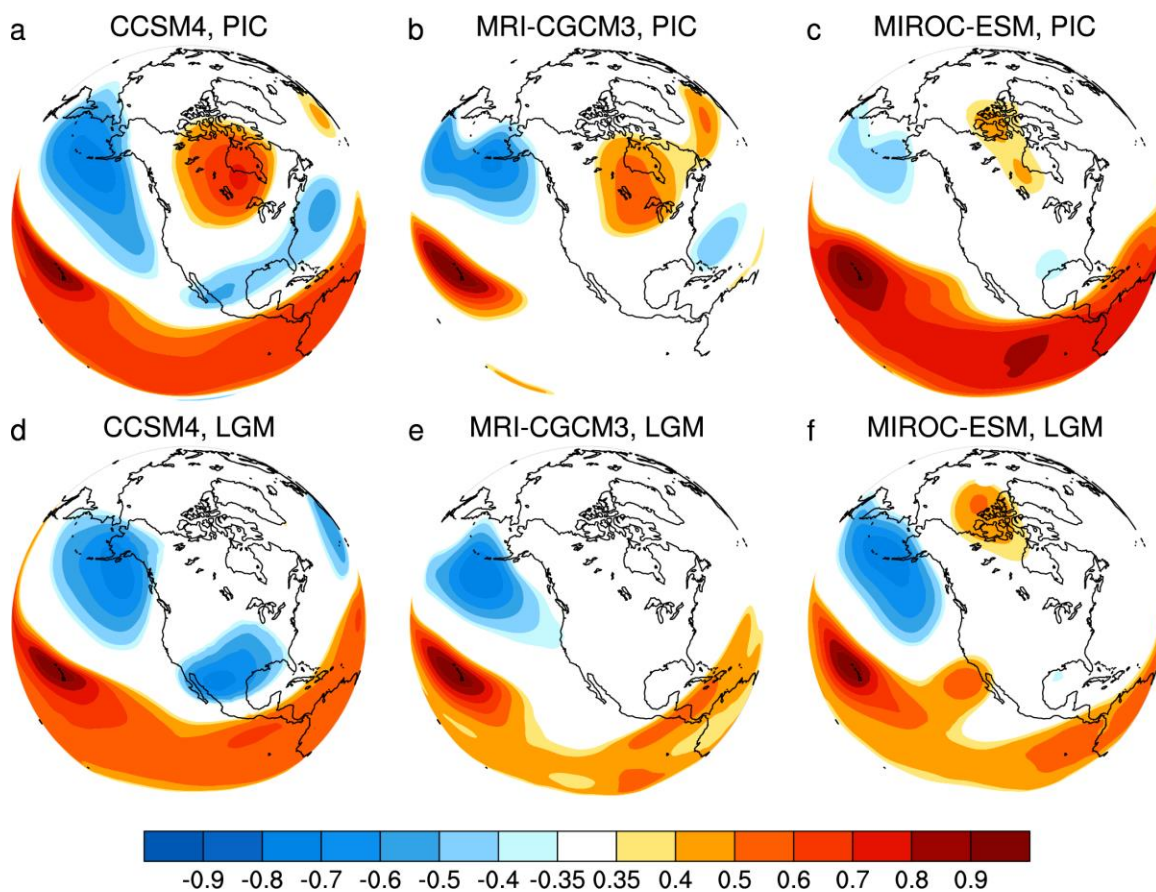

**Figure S4.** One-point correlation maps of 500 hPa geopotential heights in DJF in three other PMIP3 models. Upper panels: PIC simulations, and lower panels: LGM simulations. The base point is near Hawaii. The correlation coefficient of 0.35 corresponds to the 95% confidence level for 30-year correlations.



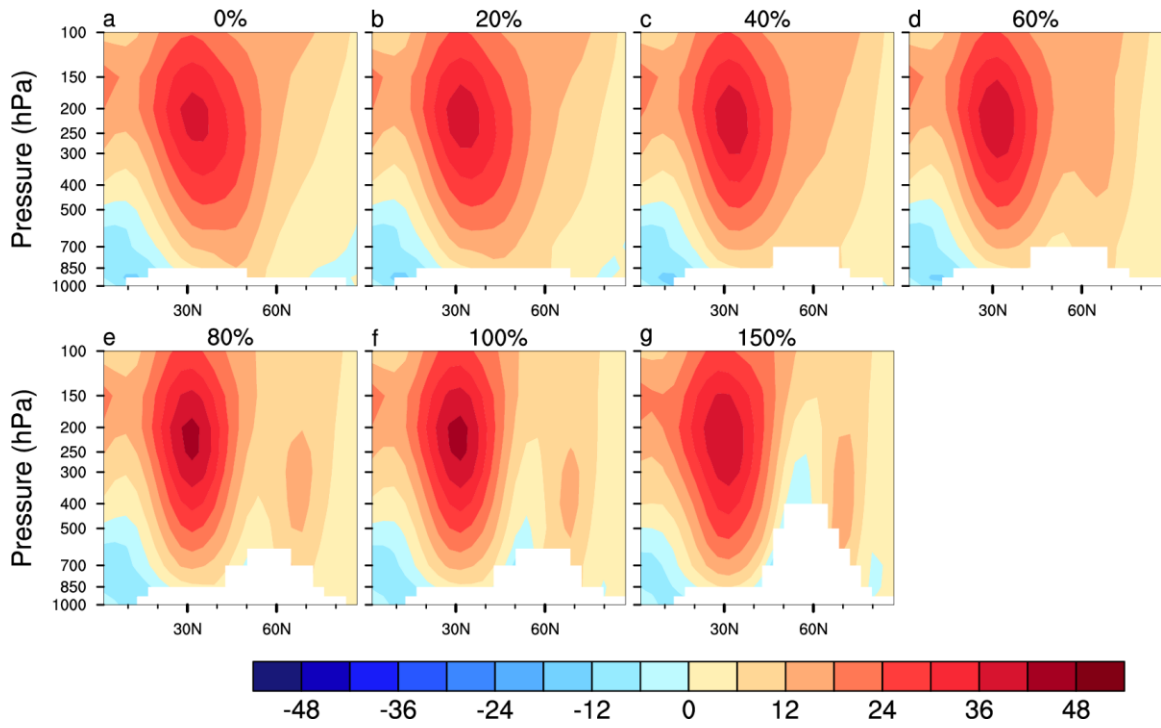

**Figure S5.** Vertical cross sections of DJF zonal winds along the longitude of 100 °W in sensitivity simulations with different ice sheet thicknesses. (a) 0%, (b) 20%, (c) 40%, (d) 60%, (e) 80%, (f) 100%, and (g) 150%. The color interval is 6 ms<sup>-1</sup>.

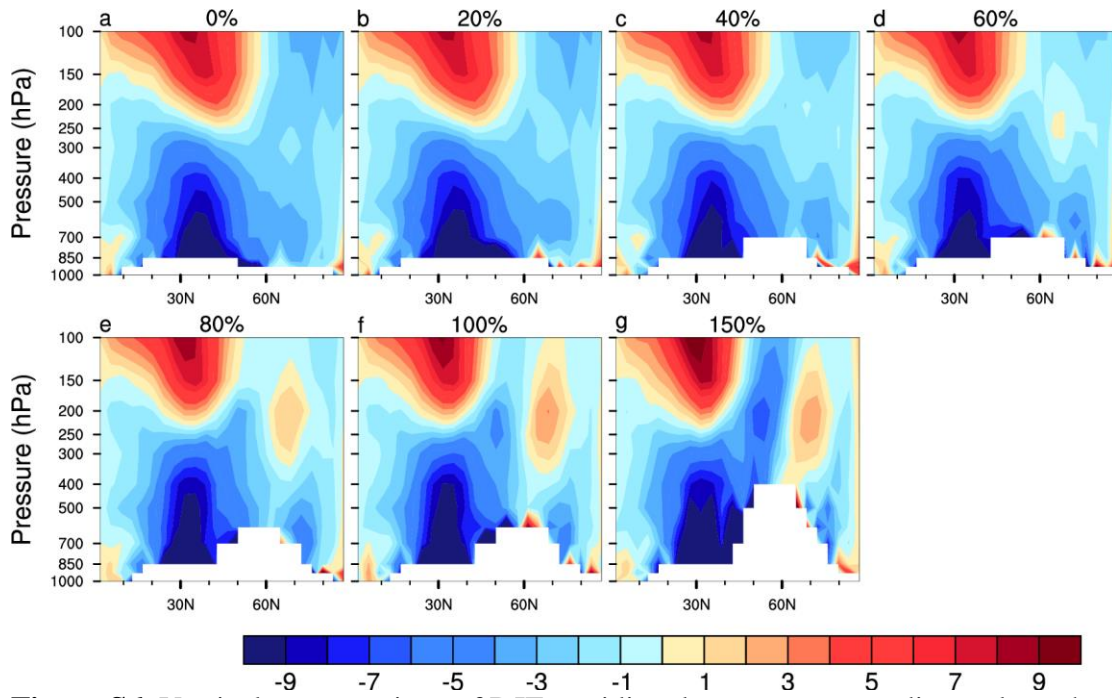

**Figure S6.** Vertical cross sections of DJF meridional temperature gradients along the longitude of 100°W in sensitivity simulations with different ice sheet thicknesses. (a) 0%, (b) 20%, (c) 40%, (d) 60%, (e) 80%, (f) 100%, and (g) 150%. The color interval is 1 K/(1000 km).

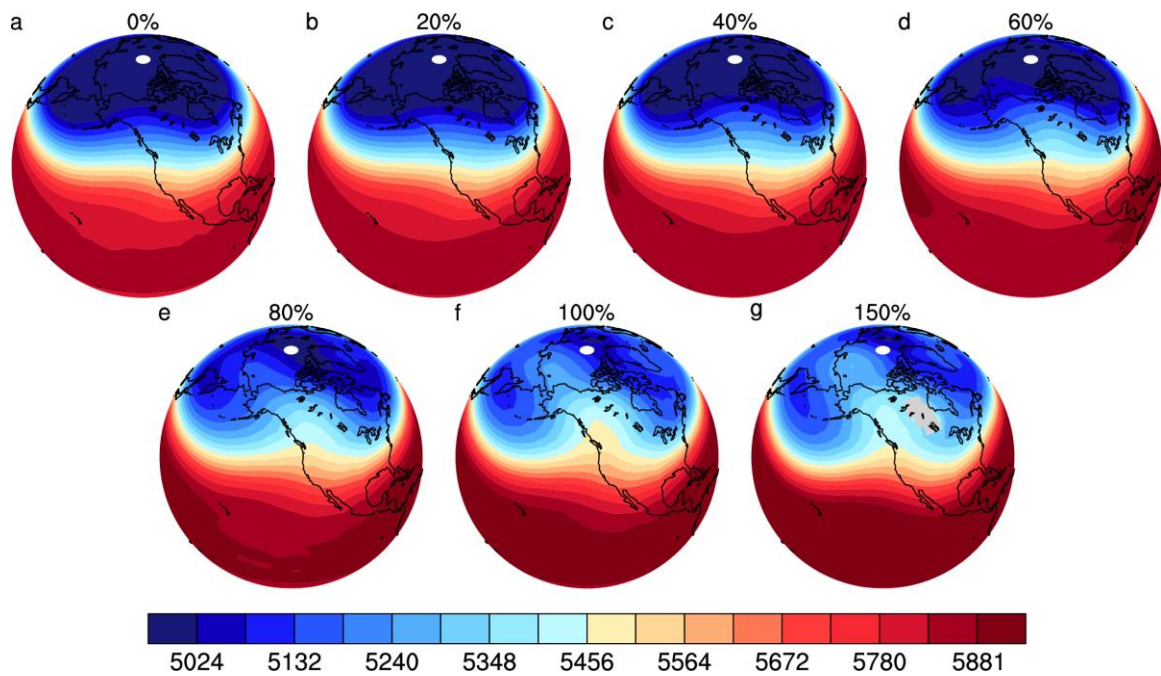

**Figure S7.** Climatological mean geopotential heights at 500 hPa in DJF in sensitivity simulations, with different ice sheet thicknesses. (a) 0%, (b) 20%, (c) 40%, (d) 60%, (e) 80%, (f) 100%, and (g) 150%. The unit is meter.



**Table S1.** The horizontal resolution of the PMIP2 (red) and PMIP3 (blue) models.

| Model name     | Horizontal resolution<br>(Lon×Lat) |
|----------------|------------------------------------|
| CCSM3          | 2.8 °×2.8 °                        |
| ECBILTCIO      | 5.6 °×5.6 °                        |
| CNRM-CM33      | 2.8 °×2.8 °                        |
| HadCM3M2       | 3.8 °×2.5 °                        |
| IPSL-CM4-V1-MR | 3.8 °×2.5 °                        |
| FGOLAS-1.0g    | 2.8 °×3.0 °                        |
| MIROC3.2       | 2.8 °×2.8 °                        |
| CCSM4          | 1.3 °×0.9 °                        |
| MRI-CGCM3      | 1.1 °×1.1 °                        |
| MIROC-ESM      | 2.8 °×2.8 °                        |
| CNRM-CM5       | 1.4 °×1.4 °                        |
| FGOALS-g2      | 2.8 °×3.0 °                        |
| GISS-E2-R      | 2.5 °×2.0 °                        |
| IPSL-CM5A-LR   | 3.8 °×1.9 °                        |
| MPI-ESM-P      | 1.9 °×1.9 °                        |
